## Selection of *Candida albicans* Trisomy during Oropharyngeal Infection Results in a Commensal-Like Phenotype

Forche, Anja<sup>a</sup>, Solis, Norma V.<sup>b</sup>, Swidergall, Marc<sup>b</sup>, Thomas, Robert<sup>c</sup>, Guyer, Alison<sup>c</sup>, Beach, Annette<sup>c</sup>, Cromie, Gareth A.<sup>d</sup>, Le, Giang, T.<sup>e</sup>, Lowell, Emily<sup>a</sup>, Pavelka, Norman<sup>e</sup>, Berman, Judith<sup>f</sup>, Dudley, Aimeé, M.<sup>d</sup>, Selmecki, Anna<sup>c</sup>, Filler, Scott G.<sup>b,g</sup>

<sup>a</sup>Department of Biology, Bowdoin College, Brunswick, Maine, USA

<sup>b</sup>Division of Infectious Diseases, Los Angeles Biomedical Research Institute at Harbor-UCLA Medical Center, Torrance, California, USA

<sup>c</sup>Department of Medical Microbiology and Immunology, Creighton University School of Medicine, Omaha, Nebraska, USA

<sup>d</sup> Pacific Northwest Research Institute, Seattle, Washington, USA

<sup>e</sup>Singapore Immunology Network (SIgN), Agency of Science, Technology and Research (A\*STAR), Singapore, Singapore

<sup>f</sup>School of Molecular Cell Biology and Biotechnology, Tel Aviv University, Israel

<sup>g</sup>Department of Medicine, David Geffen School of Medicine at UCLA, Los Angeles, California, USA

Corresponding authors:

Anja Forche PhD

Bowdoin College  
Department of Biology  
6500 College Station  
Brunswick, ME 04011 USA  
Phone: (207)-798-4153  
Email: [aforche@bowdoin.edu](mailto:aforche@bowdoin.edu)

Scott G. Filler MD  
Division of Infectious Diseases, Los Angeles Biomedical Research Institute at Harbor-UCLA Medical Center  
1124 West Carson Street  
Torrance, CA 90509, USA  
Phone: (310) 222-6426  
([sfiller@ucla.edu](mailto:sfiller@ucla.edu))

Running head: Adaptive trisomy in *C. albicans*

Key words: *Candida albicans*, adaptive trisomy, *in vivo*, fungus-host interactions, immune response

## Abstract

When the fungus *Candida albicans* proliferates in the oropharyngeal cavity during experimental oropharyngeal candidiasis (OPC), it undergoes large-scale genome changes at a much higher frequency than when it grows *in vitro*. Previously, we identified a specific whole chromosome amplification, trisomy of Chr 6 (Chr6x3), that was highly overrepresented among strains recovered from the tongues of mice with OPC. To determine the functional significance of this trisomy, we assessed the virulence of two Chr6 trisomic strains and a Chr5 trisomic strain in the mouse model of OPC. We also analyzed the expression of virulence-associated traits *in vitro*. All three trisomic strains exhibited characteristics of a commensal during OPC in mice. They achieved the same oral fungal burden as the diploid progenitor strain but caused significantly less weight loss and elicited a significantly lower inflammatory host response. *In vitro*, all three trisomic strains had reduced capacity to adhere to and invade oral epithelial cells and increased susceptibility to neutrophil killing. Whole genome sequencing of pre- and post-infection isolates found that the trisomies were usually maintained. Most post-infection isolates also contained *de novo* point mutations, but these were not conserved. While *in vitro* growth assays did not reveal phenotypes specific to *de novo* point mutations, they did reveal novel phenotypes specific to each lineage. These data reveal that during OPC, clones that are trisomic for Chr5 or Chr6 are selected and they facilitate a commensal-like phenotype.

## 1 Introduction

2 Microbe-host interactions are highly complex. Following initial inoculation, multiple outcomes  
3 including colonization, commensalism, latency and disease are possible (Casadevall and Pirofski 2000;  
4 Casadevall 2017; Casadevall and Pirofski 2018). The immune status of the host is a key factor that  
5 determines the outcome of fungus-host interactions, especially for opportunistic fungi (Netea et al. 2015;  
6 Khanna et al. 2016; Verma et al. 2017b). More recently, it has been appreciated that the genotype of  
7 the fungus also determines the outcome of this interaction. For example, in *C. albicans*, intra-species  
8 diversity among clinical strains results in differential modulation of fungus-host interactions (Schonherr et  
9 al. 2017). Similarly, intra-species diversity of *Cryptococcus neoformans* is associated with different  
10 clinical outcomes in patients with cryptococcal meningitis (Beale et al. 2015).

11 *C. albicans* is generally a clonal organism without conventional meiosis, and therefore the  
12 mechanisms to generate genotypic and phenotypic diversity are limited. Nonetheless, genomic analysis  
13 of a panel of clinical *C. albicans* strains revealed that many contained large-scale genome changes such  
14 as whole and segmental chromosome (Chr) aneuploidy and loss of heterozygosity (LOH), with frequent  
15 aneuploidy of Chrs 5 and 7. Interestingly, one strain with a loss-of-function mutation in *EGF1* exhibited  
16 decreased systemic virulence and increased gastrointestinal (GI) colonization in mouse models  
17 (Hirakawa et al. 2015). LOH events were commonly associated with acquisition of antifungal resistance,  
18 while aneuploidies appeared transiently in a study of oral strain series. In addition, several virulence-  
19 associated traits such as adherence and filamentation differed among the 43 strains tested (Ford et al.  
20 2015).

21 Large-scale genome changes, including whole Chr and segmental LOH, also arise *in vitro* as a  
22 result of exposure to environmental stress such as nutrient limitation, oxidative stress, temperature and  
23 antifungal drug exposure (Rustchenko et al. 1994; Janbon et al. 1998; Gresham et al. 2008; Forche et  
24 al. 2011; Yona et al. 2012; Hill et al. 2013; Gerstein et al. 2015). Importantly, the frequency, type and  
25 extent of genomic changes is influenced by the nature and severity of the stressor (Forche et al. 2011).

26 Exposure to the host clearly represents the most complex stress that *C. albicans* encounters, and  
27 this interaction cannot be fully replicated *in vitro*. Previously, we determined that genotypic and

28 phenotypic diversity appears as early as 1 day post-infection during both hematogenously disseminated  
29 and oropharyngeal candidiasis (OPC) in mouse models of infection (Forche et al. 2005; Forche et al.  
30 2009; Forche et al. 2018). Genomic changes, in particular LOH, are 3 orders of magnitude more frequent  
31 *in vivo* compared to *in vitro* (Forche et al. 2009a; Ene et al. 2018; Forche et al. 2018). This strongly  
32 suggests that genome plasticity of the fungus may have a larger role in the fungus-host interaction than  
33 was previously appreciated. Our recent study of rapid *C. albicans* genome diversification during OPC  
34 identified a specific whole Chr amplification, trisomy of Chr 6 (Chr6x3), that was highly overrepresented  
35 among strains recovered from the tongues of mice after one round of infection. Chr6x3 was detected in  
36 65% of mice and the allele combination ABB was 2-fold more common than the allele combination AAB  
37 (Forche et al. 2018).

38 Here, we tested the hypothesis that Chr6 trisomy is beneficial in the oral host environment and  
39 that strains with this genotype exhibit enhanced fitness compared to the progenitor during oropharyngeal  
40 infection. Strikingly, trisomy of Chr6x3 in two strains and trisomy of Chr5 (Chr5x3) in one strain all  
41 exhibited characteristics of commensals during oropharyngeal infection--they achieved the same oral  
42 fungal burden as the diploid progenitor strain yet caused significantly less weight loss, and they elicited  
43 a significantly lower inflammatory host response. *In vitro*, all three trisomic strains had reduced capacity  
44 to adhere to and invade oral epithelial cells. Whole genome sequencing showed that trisomies were  
45 mostly maintained, while point mutations that arose *de novo* in some lineages were unique to each  
46 lineage. Although *in vitro* growth assays did not reveal phenotypes specific to *de novo* point mutations,  
47 they did reveal novel phenotypes specific to each lineage under conditions that are relevant to fungus-  
48 host interactions and virulence potential. Taken together, our results reveal that Chr5x3 or Chr6x3 clones  
49 have a commensal-like phenotype that was apparently selected during OPC infection.

50

51

## 52 Results

### 53 Trisomic strains show a commensal phenotype in an oropharyngeal infection model

54 During oropharyngeal infection in mice, a specific trisomy, Chr6x3, was significantly enriched  
55 among strains and recovered from the majority of immunocompromised mice (Forche et al. 2018). The  
56 frequency of Chr6x3 increased over the course of infection (Fig. 1A) with the allele combination ABB  
57 occurring 2-fold more frequently than the AAB combination (Fig. 1B), suggesting that clones with trisomy  
58 of Chr6 have a general fitness advantage during OPC and that an extra copy of allele B may be more  
59 beneficial than an extra copy of allele A in this host niche. To test this hypothesis, we selected several  
60 strains that, based on whole genome  
61 karyotypes (produced using double digest  
62 restriction-site associated DNA sequencing  
63 (ddRADseq)), had acquired single trisomies  
64 as the only change compared to the diploid  
65 progenitor, strain YJB9318. Strains AF1275  
66 and AF1485 both had acquired Chr6x3, the  
67 former with allele combination ABB  
68 (Chr6ABB) and the latter with allele  
69 combination AAB (Chr6AAB). Each strain  
70 was originally recovered from the  
71 oropharynx of the same mouse.  
72 Importantly, these strains had not been  
73 subjected to any selection regimes (e.g.,  
74 *GAL1* counterselection-induced). A third  
75 strain, AF1773, that had acquired Chr5x3  
76 (Chr5AAB) and a small LOH on Chr1 (due  
77 to selection for *GAL1* LOH), served as

**Fig.1.** Chr6 trisomy ABB is overrepresented in isolates recovered from mice with OPC. (A) The frequency of Chr6 trisomy increases over the course of infection. (B) Among Chr6 trisomic strains, genotype ABB is the most frequent allele combination. For each genotype, symbol size is proportional to the frequency of isolation. Results are from the analysis of *C. albicans* colonies from 3-5 mice per time point as described in (Forche et al, 2018).

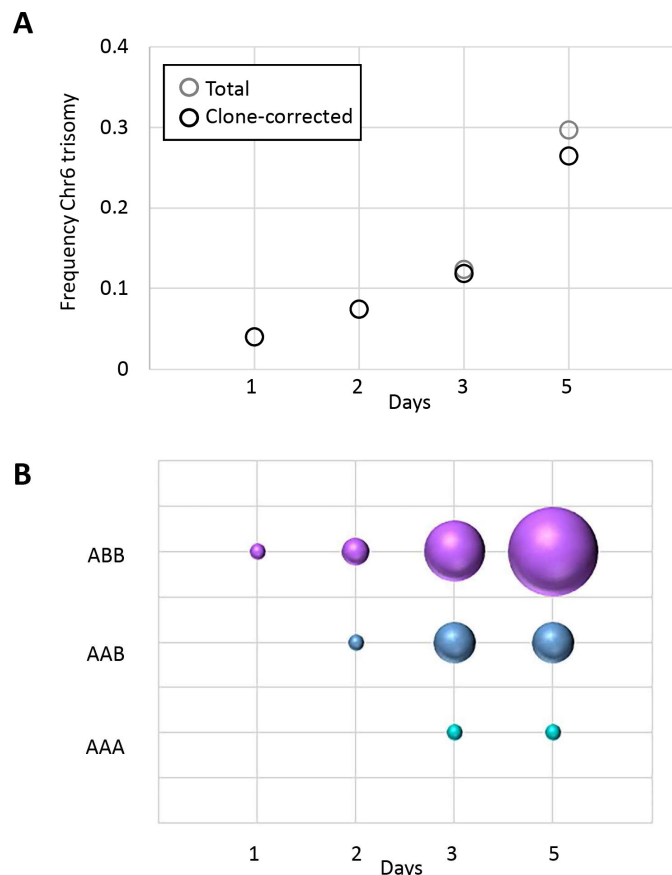

78 control for a trisomy that did not involve Chr6. Of note, Chr5x3 was the second most common aneuploidy  
79 acquired in strains from the OPC model (Forche et al. 2018).

80 We assessed the virulence of the three trisomic strains (Chr6ABB, Chr6AAB, Chr5AAB) relative  
81 to their diploid progenitor during OPC in mice that had been immunosuppressed with cortisone acetate.  
82 Each strain was tested in 8 mice in two independent experiments for a total of 16 mice per strain. After 5  
83 days of infection, the oral fungal burden of mice infected with all trisomic strains was similar to that of  
84 mice infected with the progenitor in terms of both Log CFU per gram of tissue (Fig. 2A) and histopathology

**Fig. 2.** Trisomic strains exhibit commensal-like phenotype in immunosuppressed mice. (A) Oral fungal burden of mice after 5 d of infection with the indicated *C. albicans* strains. (B) Myeloperoxidase (MPO) levels in the oral tissues of mice after 3 d of infection with the indicated strains. (C) Body mass of mice after 3, 4 and 5 d of infection with the indicated strains. Results in (A) and (C) are the median  $\pm$  interquartile range of combined data from 2 independent experiments, each using 8 mice per strain. Results in (B) are the median  $\pm$  interquartile range of data from a single experiment with 8 mice per strain. \*,  $p < 0.05$ , \*\*,  $p < 0.01$ , \*\*\*,  $p < 0.001$  by the Wilcoxon rank sum test.

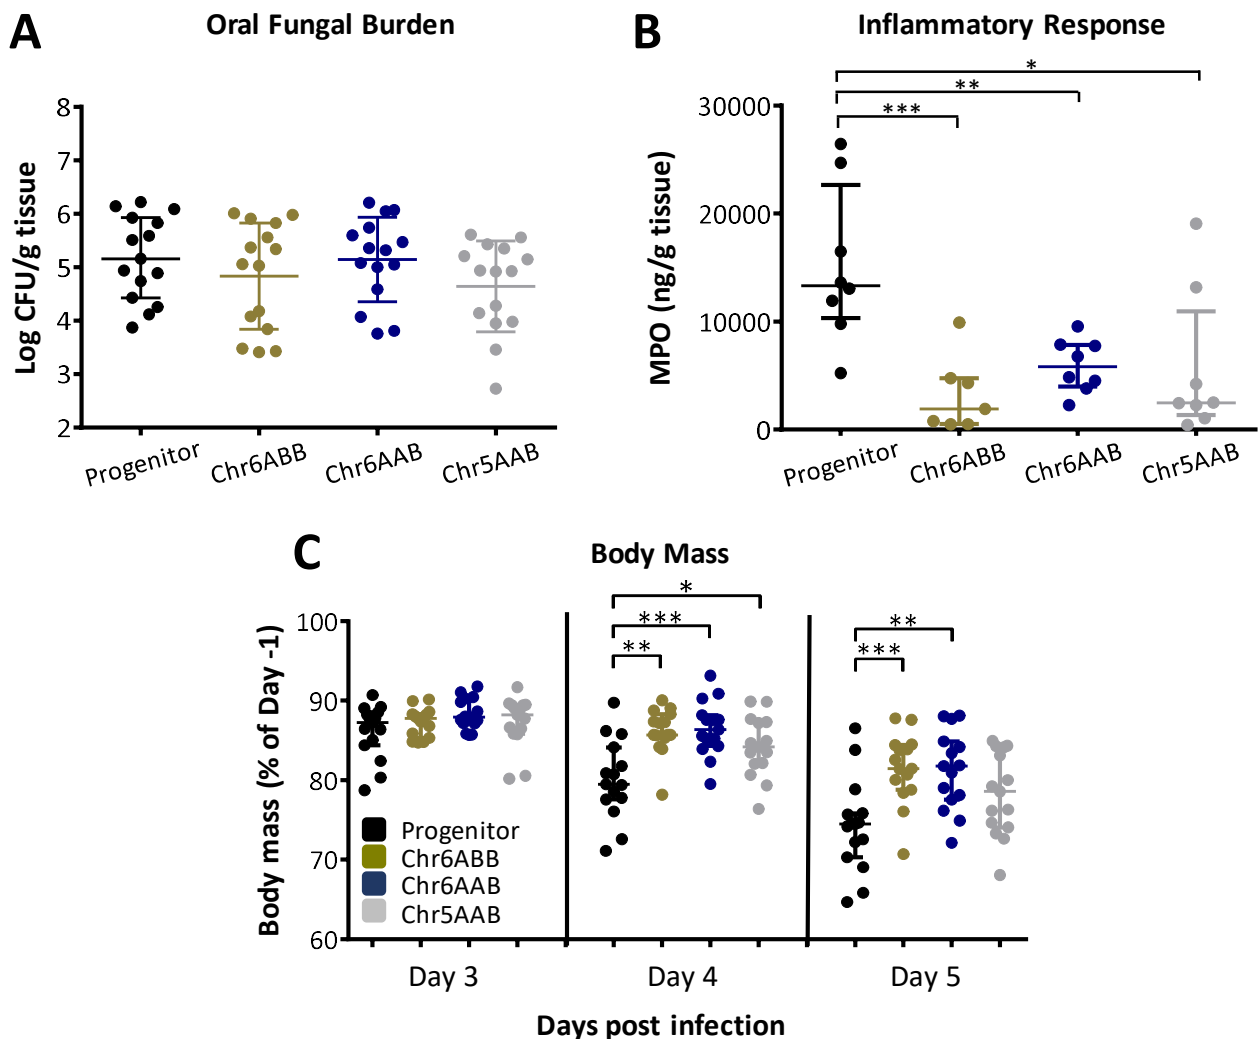

85 (data not shown). The inflammatory response induced by the different strains was assessed using the  
86 myeloperoxidase (MPO) content as a marker for the accumulation of phagocytes (neutrophils and  
87 macrophages) in the oral tissues (Glasgow et al. 2007; DE et al. 2009). Strikingly, immunocompromised  
88 mice infected with the trisomic strains had significantly lower tissue MPO levels relative to mice infected  
89 with the progenitor strain (Fig. 2B). Furthermore, mice infected with the Chr6 trisomic strains lost  
90 significantly less weight than mice infected with the progenitor on days 4 and 5 post-infection, while mice  
91 infected with the Chr5 trisomic strain showed significantly less weight loss on day 4, but not day 5 post-  
92 infection (Fig. 2C). Thus, the trisomic strains were able to proliferate to wild-type levels in the oropharynx,  
93 yet induced less inflammation and caused less disease, suggesting they promoted a commensal-like  
94 association with the immunosuppressed host.

95

### 96 **Chr6ABB behaves similar to the progenitor in an immunocompetent OPC model**

97 Diverse clinical strains of *C. albicans* exhibit one of two phenotypes in the immunocompetent  
98 mouse model of OPC (Schonherr et al. 2017). The commensal-like group induces a relatively weak  
99 inflammatory response and persists in the oropharynx of immunocompetent mice for a prolonged time  
100 period. Others, such as blood isolate SC5314, induce a strong inflammatory response and are cleared

**Fig. 3.** The Chr6ABB strain has a commensal-like phenotype in immunocompetent mice. (A) Oral fungal burden of immunocompetent mice after 1 d of infection with the progenitor and Chr6ABB strains. (B) MPO levels in the oral tissues of the mice after 1 d of infection with the indicated strains. (C) Body mass of the mice after 1, 2 and 3 d of infection with the indicated strains. Results in (A) and (B) are the median  $\pm$  interquartile range of data from a single experiment, each using 8 mice per strain. Results in (C) are the median  $\pm$  interquartile ranges of data from a single experiment with 18-22 mice per strain on d 1 and 10-14 mice per strain on d 2 and 3. \*,  $p < 0.05$ , \*\*,  $p < 0.01$ , \*\*\*,  $p < 0.001$  by the Wilcoxon rank sum test.

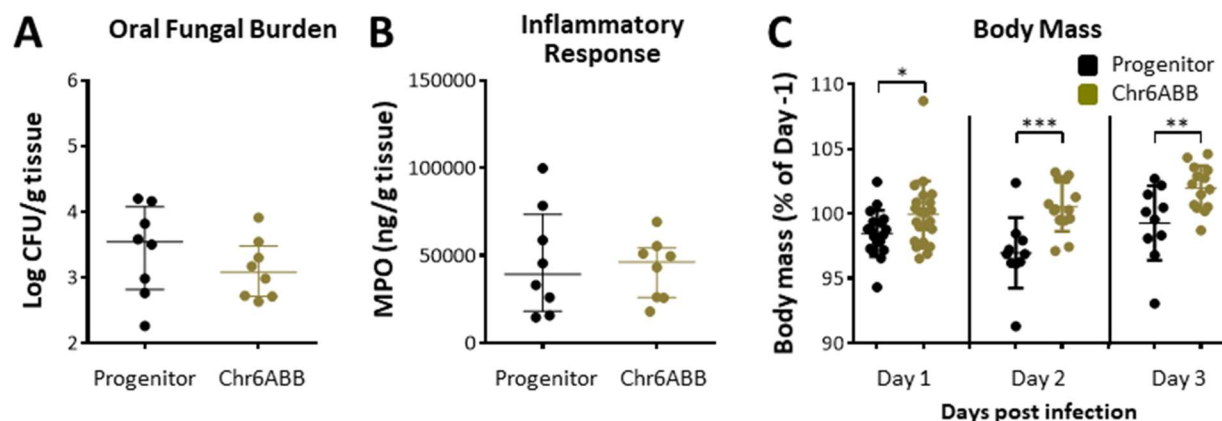

101 from the oropharynx within 2-3 days. Of note, all strains used in our study were derived from strain  
102 SC5314. To ask if Chr6x3 induces a commensal-like phenotype in immunocompetent mice, we compared  
103 the Chr6ABB strain with the progenitor strain. The oral fungal burden and MPO content of mice infected  
104 with the Chr6ABB strain was similar to that of mice infected with the progenitor (Fig. 3A and B) after 1  
105 day post-inoculation. By days 3 post-inoculation, the mice had cleared both strains of *C. albicans* from  
106 the oropharynx. Notably, the immunocompetent mice infected with the Chr6ABB strain lost significantly  
107 less weight than the mice infected with the progenitor (Fig. 3C), again indicating less severe disease  
108 associated with Chr6x3.

109

#### 110 Infection with the Chr6ABB strain induced a weaker chemokine and IL-17A response

111 To further analyze the inflammatory response induced by the Chr6ABB strain, we determined the  
112 profile of chemokines, pro-inflammatory cytokines, and alarmins in the oral tissues of mice infected with  
113 this strain relative to the progenitor. In the immunocompetent mice, the Chr6ABB strain induced

**Fig. 4.** Oral infection with the Chr6ABB strain induced less production of inflammatory mediators in the oral tissues of immunocompetent mice (A) after 1 d of infection and immunosuppressed mice (B) after 5 d. Results are the median  $\pm$  interquartile ranges of data from a single experiment with 6 mice per strain. \*,  $p < 0.05$ , \*\*,  $p < 0.01$ , \*\*\*,  $p < 0.001$  NS, not significant, by the Wilcoxon rank sum test, corrected for multiple comparisons.

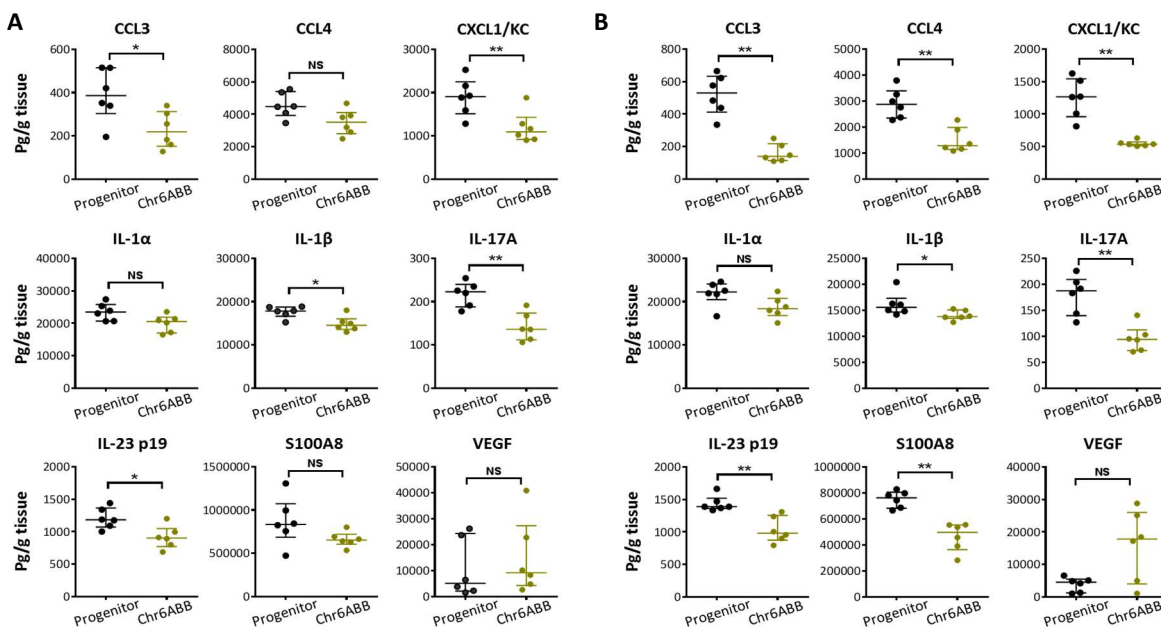

114 significantly less CCL3, CXCL1 (KC), IL-1 $\beta$ , IL-17A, and the p19 subunit of IL-23 in the oral tissues



115 relative to the progenitor strain after 1 day of infection (Fig. 4A). The Chr6ABB strain also induced a  
116 weaker inflammatory response in corticosteroid-immunosuppressed mice after 5 days of infection (Fig.  
117 4B). Collectively, these results indicate that the Chr6ABB strain induced an attenuated inflammatory  
118 response in both immunocompetent and immunosuppressed mice despite proliferating in the oropharynx  
119 to the same extent as the progenitor.

120

### 121 **The trisomic strains had reduced adherence to and invasion of oral epithelial cells, and were more** 122 **susceptible to neutrophil killing**

123 We tested the capacity of the trisomic strains to adhere to, invade, and damage oral epithelial

124 cells, as well as their

125 susceptibility to killing

126 by human

127 neutrophils, *in vitro*.

128 The number of

129 epithelial cell-

130 associated

131 organisms, a

132 measure of

133 adherence, was

134 significantly reduced

135 for the trisomic

136 strains relative to the

137 progenitor strain (Fig.

138 5A). The trisomic

139 strains also were

140 endocytosed poorly as compared to the progenitor strain (Fig. 5B). The two Chr6x3 strains (Chr6ABB

141 and Chr6AAB) induced a similar extent of epithelial cell damage relative to the progenitor, while the

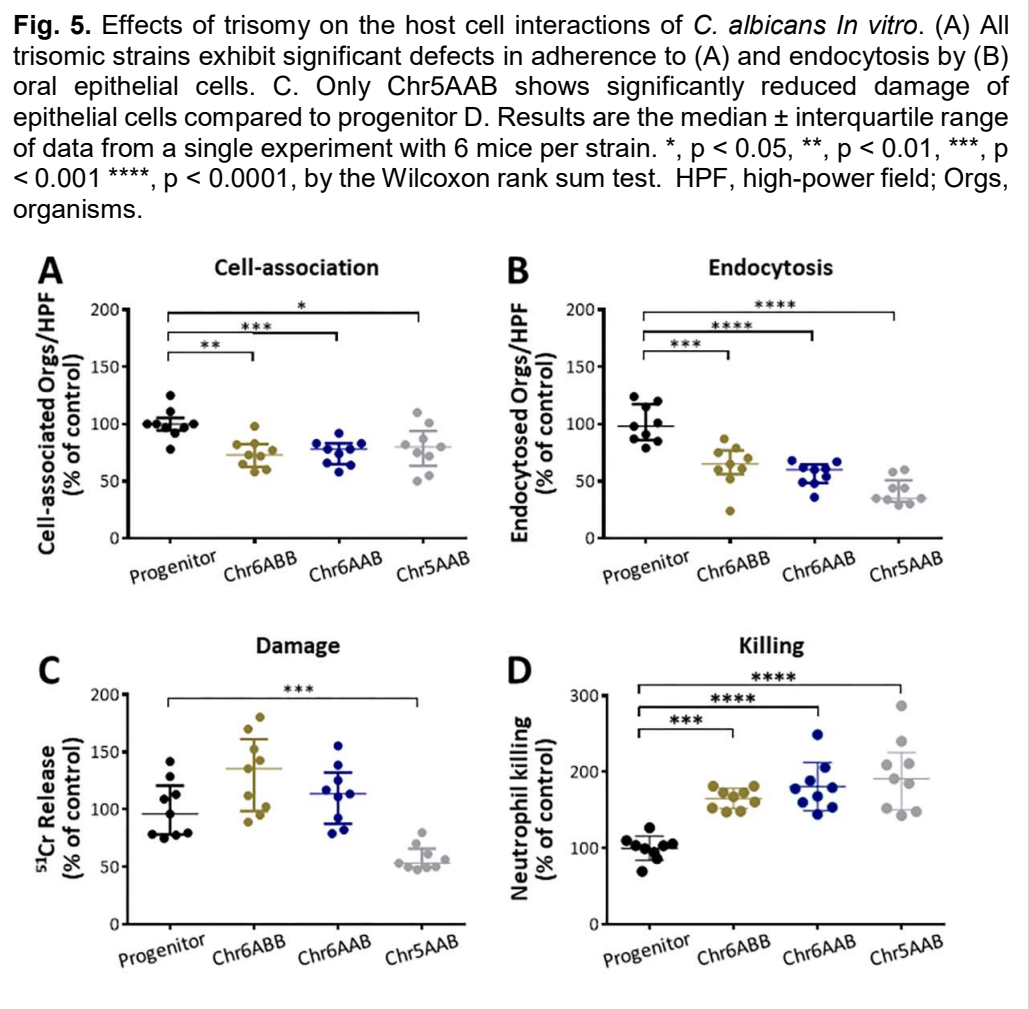

140 endocytosed poorly as compared to the progenitor strain (Fig. 5B). The two Chr6x3 strains (Chr6ABB

141 and Chr6AAB) induced a similar extent of epithelial cell damage relative to the progenitor, while the

142 Chr5x3 strain caused significantly less damage (Fig. 5C). Surprisingly, all three trisomic strains were  
 143 more susceptible than the progenitor strain to neutrophil killing (Fig. 5D). Thus, strains with trisomy of  
 144 Chr5 or Chr6 have reduced epithelial cell adherence and invasion as well as increased susceptibility to  
 145 neutrophil killing *in vitro*.

146 **Phenotypes common and unique to each trisomic lineage**

147 We performed growth  
 148 assays by spot dilution for the  
 149 original trisomic strains  
 150 (Forche et al. 2018) as well  
 151 as for several single colony  
 152 isolates recovered after oral  
 153 infection. In addition to testing  
 154 17 different growth conditions  
 155 at both 30°C and 37°C, we  
 156 determined  
 157 lipase/phospholipase  
 158 hydrolytic activity on egg yolk  
 159 agar (Fig.6, Fig.S1). Under  
 160 the majority of conditions, the  
 161 trisomic strains grew similarly  
 162 to the progenitor strain.  
 163 However, the Chr6x3 strains  
 164 were less susceptible than  
 165 the progenitor to SDS and  
 166 rapamycin, and more  
 167 susceptible to protamine

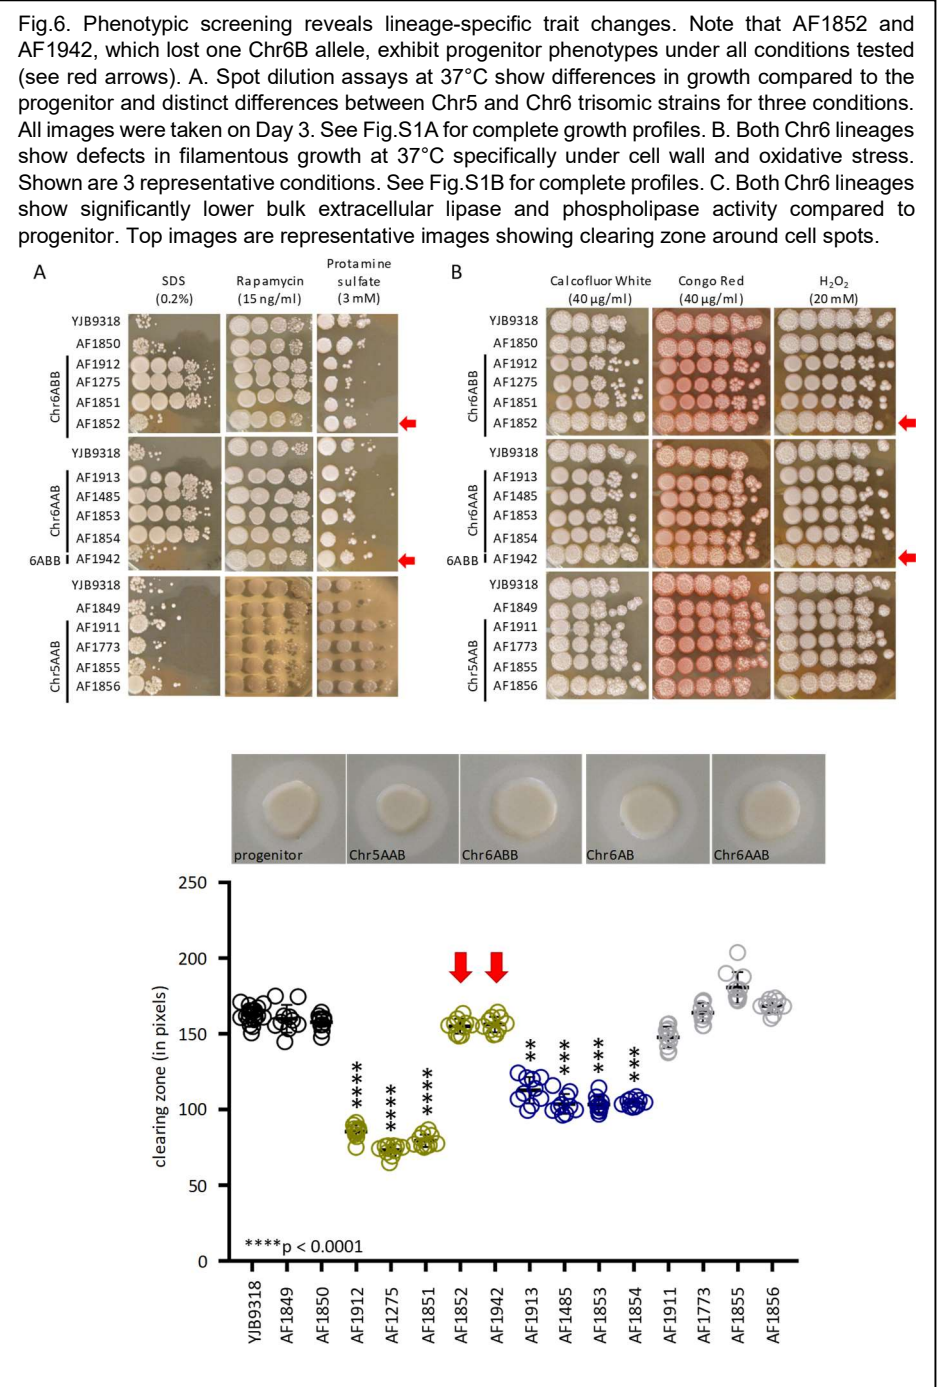

168 sulfate (Fig. 6A, Fig.S1). By contrast, the Chr5AAB strain was more susceptible to rapamycin, but less

169 susceptible to protamine sulfate. Interestingly, all three strains showed less filamentous growth than the  
170 progenitor (spots were smooth or only slightly wrinkled vs wrinkled progenitor colonies) under a variety  
171 of conditions (Fig. 6B, Fig.S1). These observations were strain-specific, with Chr5AAB showing the  
172 fewest defects and Chr6ABB the most defects in filamentous growth (Fig.6B, Fig.S1). The Chr6x3 strains  
173 also had reduced extracellular lipase/phospholipase hydrolytic activity relative to the progenitor strain  
174 (Fig. 6C). Importantly, strains AF1852 and AF1942, both of which lost one Chr6B allele during oral  
175 infection, exhibited progenitor phenotypes under all conditions tested (Fig.6, Fig.S1). This result strongly  
176 supports the idea that the extra copy of Chr6B was necessary and sufficient to induce the observed  
177 phenotypes in the Chr6x3 strain.

178

### 179 **Trisomies in Chr6 were mostly maintained during OPC**

180 Because strains with aneuploid chromosomes are often unstable, we measured strain ploidy  
181 levels both before and after OPC infection, using a qPCR approach that sampled 4 markers along each  
182 of the eight chromosomes from inoculum streaks, from single colonies of the inoculum, and from single  
183 colonies recovered from different mice after OPC. At the population level (streak), all 4 strains maintained  
184 their original karyotype over the three days of inoculum preparation (Fig. S2). However, when single  
185 colonies were analyzed, 1 of 5 colonies of the Chr6ABB strain had lost Chr6 trisomy, indicating that  
186 Chr6x3 is not very stable, and raising the possibility that the initial inoculum of this strain was a mixed  
187 population. Next, we analyzed multiple colonies from all four strains to ask if any large-scale genomic  
188 changes had occurred during infection. No novel aneuploidies were found in any of the analyzed strains  
189 (Fig.7A, Fig.S2). In total, 27% (6/22) of individuals from the Chr6ABB strain background had lost the  
190 trisomy during the course of the OPC infection experiment. Similarly, 31% (5/16) of the strains from the  
191 Chr6AAB strain background were no longer trisomic. By contrast, all post-infection strains of the  
192 progenitor and of the Chr5AAB strains had maintained their original karyotypes (see also below). Thus,  
193 Chr6x3 appears to be more unstable than Chr5AAB and thus likely requires positive selection for its  
194 maintenance in the OPC model.

**Fig. 7.** Whole genome sequence analysis of the trisomic strains. (A) The genomes of most strains were stably maintained during transformation and second oral infection. YMAPs showing the local copy number estimates for strains from which whole genome sequence data were obtained. Note that strain AF1852 had lost one copy of Chr6B. Het, heterozygous; hom, homozygous; 1<sup>st</sup> OPC, original oral infection (Forche et al. 2018); 2<sup>nd</sup> OPC, strains isolated from mice in the current experiments. (B) *De novo* point mutations arose during the 2<sup>nd</sup> OPC but were not shared among trisomic lineages. Diagram of the strain lineages showing the genomic changes and the SNPs in the indicated genes (see Table S2 for detailed information on SNPs); \* Tagged with unique barcode at the NEUT5L locus.

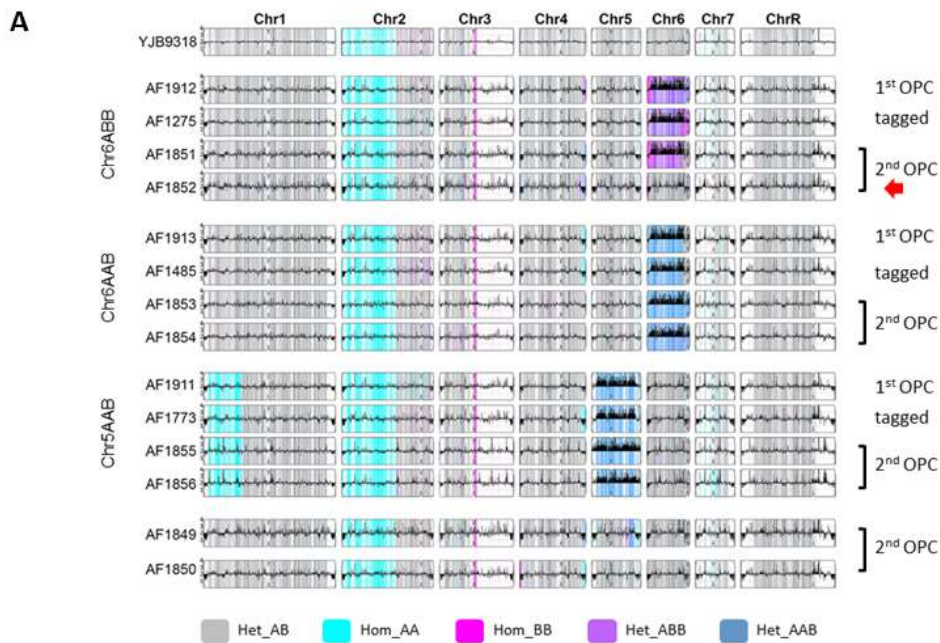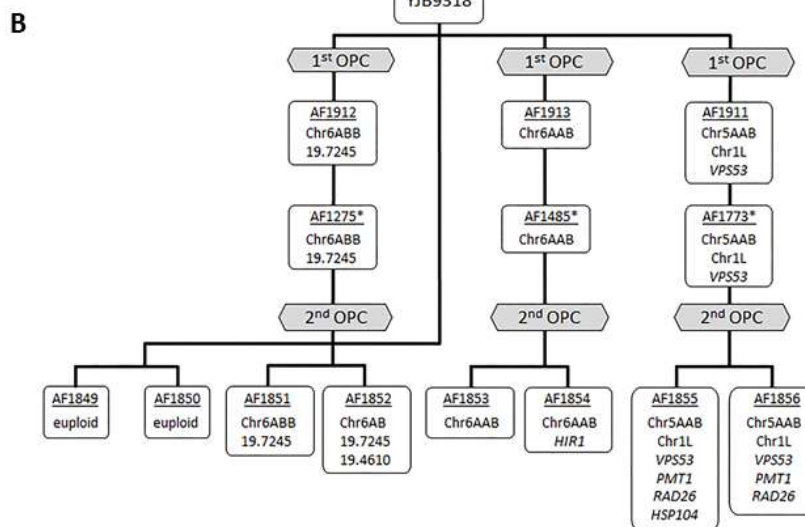

196

197 **Trisomic strains acquired relatively few *de novo* point mutations during OPC, and these were not**  
198 **conserved**

199 SNPs, INDELS, LOH and CNVs were identified in the post-OPC isolates using Illumina whole genome  
200 sequencing (see Fig 7A). Maintenance and loss of aneuploid chromosomes, detected by qPCR, were  
201 confirmed for all strains (Fig. 7B). Importantly, the karyotypes of these strains were stable during  
202 transformation and during 5 days of OPC in all strains except for strain AF1852, which was a post-  
203 infection Chr6ABB strain (Fig. 7B). No *de novo* large-scale LOH events were observed. We identified a  
204 total of 8 *de novo* SNPs/Indels, all of which were heterozygous; we verified each SNP by Sanger  
205 sequencing of the parent and evolved strains (Fig. 7A, Table S2). Seven of these SNPs were located in  
206 coding regions and one was intergenic (Table S2). Thus, *de novo* mutations were identified in all three  
207 lineages, with none of them were recurrent (shared among strains). These results strongly suggest that  
208 the commensal-like phenotype was indeed due to whole Chr aneuploidies.

209

210 **Discussion**

211 When *C. albicans* infects a mammalian host, it is exposed to a variety of different stressors that  
212 vary with both the anatomic niche and the duration of infection. Many stressors, such as reactive oxygen  
213 species produced by immune cells, antimicrobial peptides, and sequestration of micronutrients are  
214 generated by the host. During infection of non-sterile mucosal surfaces, the fungus must also withstand  
215 stressors generated by the competing bacterial microbiota. The magnitude of stress experienced by *C.*  
216 *albicans* at a specific infection site is likely dependent on whether the organism is growing as a  
217 commensal or a pathogen. For example, when *C. albicans* grows in the oropharynx as a commensal, it  
218 induces only a weak host response and is thus unlikely to experience significant oxidant stress induced  
219 by activated phagocytes. By contrast, when *C. albicans* overgrows and causes OPC, the massive influx  
220 of neutrophils subjects the organism to substantial oxidant stress (Swidergall and Filler 2017; Verma et  
221 al. 2017a). The multiplicity of stressors encountered by *C. albicans* necessitates that it adapts to specific  
222 host micro niches.

223 Aneuploidy and LOH of *C. albicans* generated *in vivo* is thought to enhance the survival and  
224 proliferation of the fungus within the host (Forche et al. 2005; Forche et al. 2009; Ene et al. 2018; Forche  
225 et al. 2018; Tso et al. 2018), a hypothesis that has been tested only in a mouse model of GI colonization  
226 (Ene et al. 2018; Tso et al. 2018). In particular, experimental evolution in the mouse GI tract selects for  
227 *C. albicans* variants harboring whole-chromosome as well as segmental aneuploidy and LOH events  
228 (Ene et al. 2018; Tso et al. 2018) and results in commensal, attenuated strains that protect their host  
229 against subsequent infection with a virulent *C. albicans* strain (Tso et al. 2018). The overrepresentation  
230 of strains with Chr6x3 in our earlier study (Forche et al. 2018), despite the instability of the trisomic state,  
231 suggests that this trisomy provides fungal cells with a competitive advantage during OPC. The results  
232 presented here demonstrate that trisomies of Chr6 and Chr5 enable *C. albicans* to infect the oropharynx  
233 at high levels, yet causes less disease. Specifically, when immunosuppressed mice were orally  
234 inoculated with the trisomic strains, their oral fungal burden was similar to that of mice infected with the  
235 diploid progenitor strain. At the same time, the trisomic strains induced a lower inflammatory response in  
236 terms of reduced phagocyte accumulation and decreased cytokine levels, which resulted in less weight  
237 loss than in mice infected with the progenitor strain. These results suggest that trisomy in either Chr6 or  
238 Chr5 causes *C. albicans* to begin to assume a commensal-like phenotype.

239 To further explore the mechanism of the commensal-like phenotype of the trisomic strains, we  
240 analyzed the host response to OPC caused by the Chr6 ABB strain relative to the progenitor strain. In  
241 both immunocompetent and immunosuppressed mice, the Chr6 ABB strain induced lower production of  
242 multiple chemokines and pro-inflammatory cytokines. The decreased levels of CCL3 and CXCL1, which  
243 are neutrophil chemoattractants, provides an explanation for the reduced levels of the phagocyte marker  
244 MPO in the oral tissues of mice infected with the trisomic strains. Reduced levels of IL-17A and IL-23,  
245 which play key roles in the host defense against OPC (Conti et al. 2009), also suggest that the trisomic  
246 strain induced less disease during OPC and are consistent with the commensal-like phenotype of the  
247 trisomic strains.

248 A potential explanation for the reduced pathogenicity of the Chr6x3 and Chr5x3 strains is provided  
249 by our *in vitro* studies: trisomic isolates had reduced capacity to adhere to and invade oral epithelial cells.

250 *C. albicans* expresses a multitude of adhesins that mediate the binding of the fungus to epithelial cells  
251 (reviewed in (Höfs et al. 2016)). One of these adhesins is Als3, which also functions as an invasin (Phan  
252 et al. 2007; Zhu et al. 2012). One possible explanation for the reduced adherence and invasion of the  
253 trisomic strains is that they have reduced surface expression of Als3. However, by flow cytometric  
254 analysis of hyphae stained with an anti-Als3 antibody, we found that Als3 surface expression of all three  
255 trisomic strains was similar to that of the progenitor strain (Solis and Filler, unpublished data). These  
256 results suggest that the adherence and invasion defects of the trisomic strains are due to reduced  
257 expression of one or more adhesin(s) and invasin(s) other than Als3.

258 When Schonherr *et al.*, (Schonherr et al. 2017) investigated the epithelial cell interactions of  
259 different strains of *C. albicans*, they found that the ones with the commensal phenotype caused less  
260 damage to epithelial cells *in vitro* than did the pathogenic strains. We found that only the Chr5 AAB strain  
261 had reduced capacity to damage the epithelial cells; both Chr6 trisomic strains induced wild-type levels  
262 of epithelial cell damage. Thus, reduction of *in vitro* epithelial cell damage did not predict the commensal-  
263 like phenotype of the Chr6 trisomic strains.

264 Surprisingly, all three trisomic strains had increased susceptibility to neutrophil killing, yet the oral  
265 fungal burden of mice infected with these strains was similar to that of mice infected with the progenitor  
266 strain. We speculate that the trisomic strains were able to persist in the oropharynx in high numbers because  
267 of the defect in phagocyte recruitment.

268 Whole genome sequence analysis did not identify any common point mutations among the  
269 trisomic lineages. This result supports the concept that the trisomic state of specific chromosomes, rather  
270 than specific point mutations, resulted in the commensal-like phenotype. In a recent study, trisomy of  
271 Chr7 (Chr7x3) was found to be common in *C. albicans* strains after *in vivo* passage in a mouse model of  
272 GI colonization (Ene et al. 2018). Chr7x3 arose in three different strain backgrounds and conferred a  
273 fitness (growth) advantage over the respective diploid progenitors in 1:1 *in vivo* competition experiments.  
274 Thus, the development of trisomy in specific chromosomes appears to influence the capacity of *C.*  
275 *albicans* to persist in distinct anatomic niches.

276 Chr6 harbors many genes important for filamentous growth, adhesion and hydrolytic enzyme  
277 production (Skrzypek et al. 2017). Importantly, strains that lost the extra copy of the Chr6B allele from  
278 the Chr6ABB strains reverted to the parental phenotypes. These data support the idea that the  
279 commensal phenotype is a multi-gene trait that is fostered by an extra copy of Chr6B. Allelic imbalance  
280 in the trisomic strains may also affect cell wall architecture and/or composition, which would then alter  
281 immune recognition by the host. Accordingly, the amount of exposed  $\beta$ -glucan on the surface of fungal  
282 cells was strongly predictive of competitive fitness in the mouse GI tract (Ene et al. 2018). Furthermore,  
283 fungal cell wall architecture, rather than cell wall composition, determines the ability of fungi to colonize  
284 the GI tract (Sem et al. 2016). Finally, a recent study on functional divergence of filamentous growth  
285 regulation in *C. albicans* found that Flo8 overexpression was sufficient to restore filamentation in a  
286 *mfg1/mfg1* mutant (Polvi et al. 2019). Importantly, Flo8 is located on Chr6 and *in vitro* evolution of three  
287 *mfg1/mfg1* lineages *in vitro* resulted in trisomy of Chr6 (Polvi et al. 2019).

288 Taken together, our data indicate that specific whole chromosome aneuploidies alter several  
289 related virulence-associated traits that affect how the host recognizes and responds to *C. albicans* during  
290 oropharyngeal infection, thereby inducing a commensal-like phenotype. Because both the *in vivo*  
291 (commensal) and *in vitro* phenotypes are likely the result of allelic imbalance of specific genes on the  
292 trisomic chromosomes, rather than due to whole chromosome trisomy, it will be imperative to identify  
293 those genes that, when present in an extra copy, enhance the capacity of *C. albicans* to interact with the  
294 host and survive in diverse anatomic sites.

295

## 296 **MATERIALS AND METHODS**

### 297 **Strains used in this study**

298 Strains are listed in Table S2 and were stored at -80°C in 50% glycerol.

299

300 **Ethics statement.** All animal work was approved by the Institutional Animal Care and Use Committee  
301 (IACUC) of the Los Angeles Biomedical Research Institute. The collection of blood from human



302 volunteers for neutrophil isolation was also approved by the Institutional Review Board of the Los Angeles  
303 Biomedical Research Institute.

304 **Mouse model of OPC.** The pathogenicity of the *C. albicans* strains during OPC was determined in both  
305 immunocompromised and immunocompetent male Balb/c mice following our standard protocol (Solis  
306 and Filler 2012). When immunocompromised mice were used, cortisone acetate (2.25 mg/kg) was  
307 administered subcutaneously on days -1, 1, and 3 (Solis and Filler 2012). For inoculation, the animals  
308 were sedated with ketamine and xylazine, and a swab saturated with  $10^6$  *C. albicans* cells was placed  
309 sublingually for 75 min. Immunocompetent mice were inoculated similarly, except that the swab was  
310 saturated with  $2 \times 10^7$  organisms (Conti et al. 2016; Solis et al. 2017). The immunocompromised and  
311 immunocompetent mice were sacrificed at 3 and 5 d and 1 and 3 d post-infection, respectively. After  
312 sacrifice, the tongue and attached tissues were harvested and divided longitudinally. One hemisection  
313 was weighed, homogenized, and quantitatively cultured. The other was embedded in paraffin, after which  
314 thin sections were prepared and then stained with periodic acid-Schiff stain (PAS).

315 **Human cell line.** The human oral epithelial cell line OKF6/TERT-2 was kindly provided by J. Rheinwald  
316 (Harvard University, Cambridge, MA) (Dickson et al. 2000) and was cultured as previously described  
317 (Phan et al. 2007).

318 **Host cell damage assay.** The extent of oral epithelial cell damage caused by different *C. albicans* strains  
319 was determined using our previously described  $^{51}\text{Cr}$  release assay (Solis et al. 2017). Briefly,  
320 OKF6/TERT-2 cells were grown to 95% confluence in 96-well tissue culture plates with detachable wells  
321 (Corning) and loaded with  $5 \mu\text{Ci/ml}$   $\text{Na}_2^{51}\text{CrO}_4$  (PerkinElmer) overnight. After rinsing the cells to remove  
322 the unincorporated  $^{51}\text{Cr}$  by rinsing, they were infected with  $6 \times 10^5$  *C. albicans* cells. After 7 h, the amount  
323 of  $^{51}\text{Cr}$  released into the medium and retained by the cells was determined by gamma counting. Each  
324 experiment was performed three times in triplicate.

325 **Measurement of *C. albicans* epithelial cell adherence and endocytosis.** *C. albicans* adherence to  
326 and endocytosis of by oral epithelial cells was quantified by a differential fluorescence assay as described  
327 previously (Park et al. 2005). Briefly, OKF6/TERT-2 cells were grown to confluency on fibronectin-coated  
328 circular glass coverslips in 24-well tissue culture plates. They were infected with  $2 \times 10^5$  yeast-phase *C.*

329 *albicans* cells per well and incubated for 2.5 h, after which they were washed, fixed, stained, and mounted  
330 inverted on microscope slides. The coverslips were viewed with an epifluorescence microscope, and the  
331 number of adherent and endocytosed organisms per high-power field (HPF) was determined, counting  
332 at least 100 organisms per coverslip. Each experiment was performed at least three times in triplicate.  
333 For MPO analysis during OPC, the tongue homogenates from immunocompromised mice a 3 d post-  
334 infection were clarified by centrifugation, and stored at  $-80^{\circ}\text{C}$ . The MPO concentration was determined  
335 using a commercial ELISA kit (Hycult Biotech).

### 336 **Measurement of cytokines in immunocompromised and immunocompetent mice.**

337 ***C. albicans* Als3 surface expression.** Flow cytometry was used to analyze the surface expression of  
338 Als3 on *C. albicans* strains, using our previously described method (Phan et al. 2007; Fu et al. 2013).  
339 Briefly, after fixing *C. albicans* cells in 3% paraformaldehyde and blocking with 1% goat serum, the cells  
340 were incubated with a rabbit polyclonal antiserum raised against the recombinant N-terminal region of  
341 Als3. Next, the cells were rinsed and incubated with a goat anti-rabbit secondary antibody conjugated to  
342 Alexa Fluor 488 (Invitrogen). Cell sorting was performed with a FACSCaliber flow cytometer (Becton,  
343 Dickinson). Fluorescence data for 10,000 cells of each strain were collected.

344 **Neutrophil killing.** The susceptibility of the various *C. albicans* strains to neutrophil killing was  
345 determined as described previously (Solis et al. 2017). Briefly, neutrophils were strained from the blood of  
346 healthy volunteers and mixed with an equal number of *C. albicans* cells in RPMI 1640 medium plus 10%  
347 fetal bovine serum. After a 3 h incubation at  $37^{\circ}\text{C}$  in 5%  $\text{CO}_2$ , the neutrophils were lysed by sonication,  
348 and the number of viable *C. albicans* cells was determined by quantitative culture. Each experiment was  
349 performed three times in triplicate (different donors).

350 **Statistics.** Data were compared by Mann-Whitney or unpaired Student's t test using GraphPad Prism (v.  
351 6) software. P values of  $< 0.05$  were considered to be statistical significant.

352 **Quantitative PCR (qPCR) to assess chromosome copy number.** To check that the trisomies were  
353 maintained during inoculum preparation and throughout the course of infection we used qPCR for 4  
354 markers along each of the 8 chromosomes to determine ploidy. The PCR primers are listed in Table S3  
355 qPCR was performed on gDNA extracted from single colonies and from streaks of the inoculum and for

356 strains recovered from the tongues of infected mice (Table S1). Streaks or single colonies were  
357 transferred from original plates directly into either 750  $\mu$ l (streaks) or 150  $\mu$ l (single colonies) of 50%  
358 glycerol, and 100  $\mu$ l were used for gDNA extraction without additional culturing. Resulting gDNA amounts  
359 were sufficient for qPCR.

360 **Whole genome sequencing and Sanger sequencing.** Genomic DNA was isolated with phenol  
361 chloroform, as described previously (Selmecki et al. 2015). Libraries were prepared using the NexteraXT  
362 DNA Sample Preparation Kit following the manufacturer's instructions (Illumina). Libraries were purified  
363 with AMPure XP beads (Agencourt) and library concentration was quantified using a Bioanalyzer High  
364 Sensitivity DNA Chip (Agilent Technologies) and a Qubit High Sensitivity dsDNA fluorometric  
365 quantification kit (Life Technologies). DNA Libraries were sequenced using paired end 2 x 250 flow cells  
366 on an Illumina MiSeq (Creighton University). Copy number and allele status was visualized using YMAP  
367 (Abbey et al. 2014). Fastq files were aligned using an in-house sequence analysis pipeline (Li and Durbin  
368 2009; Li et al. 2009; Li and Durbin 2010) and custom Python scripts. The progenitor strain and any of the  
369 evolved (Bolger et al. 2014) strains were analyzed using Mutect (Cibulskis et al. 2013) resulting in  
370 individual output files containing *de novo* SNPs that were acquired by the evolved strains. SNP regions  
371 were validated by eye in IGV. For non-synonymous *de novo* SNPs, primer pairs were generated with  
372 Primer 3 (Untergasser et al. 2012) (Table S3) to yield PCR products of about 400 bp. SNPs were  
373 confirmed by Sanger sequencing of amplified products as described (Selmecki et al. 2006).

374 **Spot dilution assays.** Strains were streaked onto YPD plates and incubated for 3 days at 30°C. Single  
375 colonies were transferred to 3 ml YPD broth and grown overnight at 30°C in a roller incubator. Cells were  
376 spun down, washed twice with PBS buffer and resuspended in 1ml PBS. The number of cells/ml was  
377 counted using a hemacytometer and all strains were adjusted to  $1 \times 10^9$  CFU/ml. For each strain, five  
378 microliters of a five-fold dilution series were spotted onto YPD, YPD light (0.2% glucose), YPD  
379 supplemented with 1 M NaCl, 150  $\mu$ M farnesol, 40 or 80  $\mu$ g/ml Congo Red, 40 or 80  $\mu$ g/ml Calcofluor  
380 White, 0.1 or 0.2% SDS, 10, 20, 40, or 100 mM  $\text{H}_2\text{O}_2$ , 15 ng/ml Rapamycin, Casitone media  
381 supplemented with 4  $\mu$ g/ml fluconazole, or 0.1  $\mu$ g/ml caspofungin, 3 mM Protamine sulfate, RPMI  
382 supplemented with 0.2% glucose and Spider medium (Azadmanesh et al. 2017). Four sets were prepared

383 for each medium, and sets were incubated at room temperature 30°C, 37°C, and 42°C, respectively,  
384 monitored for growth and colony appearance and photographed on days 2, 3 and 6.

385 **Extracellular lipase/phospholipase activity.** To assay lipase and phospholipase hydrolytic activity, five  
386 microliters of the  $1 \times 10^9$  CFU/ml stock was spotted onto egg yolk agar plates (EYA; 10% egg yolk  
387 emulsion, 1% peptone, 1.5% agar, 3% glucose, 5.73% NaCl, 0.055%  $\text{CaCl}_2$ ) (Noumi et al. 2010). Spots  
388 were allowed to dry and plates were incubated at 37°C for up to 5 days, photographed on day 5 and  
389 images were analyzed with ImageJ. For each strain, twenty measurements of the extent of the clearing  
390 around each spot were taken. To determine whether the differences in clearing were significantly different  
391 from the parental strain and between strains unpaired Student's t test were done using GraphPad Prism  
392 (v. 6) software. A p-value of  $< 0.05$  was considered significant.

#### 393 **Data availability**

394 WGS data have been deposited at the SRA database under accession number SRP126179 (Temporary  
395 submission ID SUB3297543).

396

#### 397 **Acknowledgements**

398 AMD, GC, EL, and AF were funded by NIH grant R15 AI090633 to AF. This work was supported in part  
399 by NIH grants R01DE022600 and R01AI124566 to SGF., and grant K99DE026856 to MS. AMS was  
400 funded by Nebraska Tobacco Settlement Biomedical Research Development New Initiative Grant  
401 (LB692), NE-EPSCoR First Award, Nebraska Department of Health and Human Services (LB506-2017-  
402 55), CURAS Faculty Research Fund Award, and an NIH-NCRR COBRE grant P20RR018788 sub-  
403 award. JB was funded by an European Research Council Advanced Award 340087 (RAPLODAPT).

404

405

406

## 407 References

- 408 Abbey DA, Funt J, Lurie-Weinberger MN, Thompson DA, Regev A, Myers CL, Berman J. 2014. YMAP: a pipeline for  
409 visualization of copy number variation and loss of heterozygosity in eukaryotic pathogens. *Genome Med*  
410 **6**: 100.
- 411 Azadmanesh J, Gowen AM, Creger PE, Schafer ND, Blankenship JR. 2017. Filamentation Involves Two Overlapping,  
412 but Distinct, Programs of Filamentation in the Pathogenic Fungus *Candida albicans*. *G3: Genes/Genomes/Genetics* **7**: 3797-3808.
- 414 Beale MA, Sabiiti W, Robertson EJ, Fuentes-Cabrejo KM, O'Hanlon SJ, Jarvis JN, Loyse A, Meintjes G, Harrison TS,  
415 May RC et al. 2015. Genotypic Diversity Is Associated with Clinical Outcome and Phenotype in  
416 Cryptococcal Meningitis across Southern Africa. *PLoS neglected tropical diseases* **9**: e0003847-e0003847.
- 417 Bolger AM, Lohse M, Usadel B. 2014. Trimmomatic: a flexible trimmer for Illumina sequence data. *Bioinformatics*  
418 (Oxford, England) **30**: 2114-2120.
- 419 Casadevall A. 2017. The Pathogenic Potential of a Microbe. *mSphere* **2**.
- 420 Casadevall A, Pirofski L-a. 2000. Host-Pathogen Interactions: Basic Concepts of Microbial Commensalism,  
421 Colonization, Infection, and Disease. *Infect Immun* **68**: 6511-6518.
- 422 Casadevall A, Pirofski L-a. 2018. What Is a Host? Attributes of Individual Susceptibility. *Infection and Immunity* **86**.
- 423 Cibulskis K, Lawrence MS, Carter SL, Sivachenko A, Jaffe D, Sougnez C, Gabriel S, Meyerson M, Lander ES, Getz G.  
424 2013. Sensitive detection of somatic point mutations in impure and heterogeneous cancer samples.  
425 *Nature Biotechnology* **31**: 213.
- 426 Conti Heather R, Bruno Vincent M, Childs Erin E, Daugherty S, Hunter Joseph P, Mengesha Bemnet G, Saevig  
427 Danielle L, Hendricks Matthew R, Coleman Bianca M, Brane L et al. 2016. IL-17 Receptor Signaling in Oral  
428 Epithelial Cells Is Critical for Protection against Oropharyngeal Candidiasis. *Cell Host & Microbe* **20**: 606-  
429 617.
- 430 Conti HR, Shen F, Nayyar N, Stocum E, Sun JN, Lindemann MJ, Ho AW, Hai JH, Yu JJ, Jung JW et al. 2009. Th17 cells  
431 and IL-17 receptor signaling are essential for mucosal host defense against oral candidiasis. *The Journal of*  
432 *Experimental Medicine* **206**: 299-311.
- 433 DE E, MM C, S R, NV S, FN G, DC S, SG F. 2009. The *Aspergillus fumigatus* transcription factor Ace2 governs pigment  
434 production, conidiation and virulence. *Mol Microbiol* **72**: 155-169.
- 435 Dickson MA, Hahn WC, Ino Y, Ronfard V, Wu JY, Weinberg RA, Louis DN, Li FP, Rheinwald JG. 2000. Human  
436 keratinocytes that express hTERT and also bypass a p16(INK4a)-enforced mechanism that limits life span  
437 become immortal yet retain normal growth and differentiation characteristics. *Molecular and cellular*  
438 *biology* **20**: 1436-1447.
- 439 Ene IV, Farrer RA, Hirakawa MP, Agwamba K, Cuomo CA, Bennett RJ. 2018. Global analysis of mutations driving  
440 microevolution of a heterozygous diploid fungal pathogen. *Proceedings of the National Academy of*  
441 *Sciences of the United States of America* **115**: E8688-E8697.
- 442 Forche A, Abbey D, Pisithkul T, Weinzierl MA, Ringstrom T, Bruck D, Petersen K, Berman J. 2011. Stress alters rates  
443 and types of loss of heterozygosity in *Candida albicans*. *MBio* **2**.
- 444 Forche A, Cromie G, Gerstein AC, Solis NV, Pisithkul T, Srifa W, Jeffery E, Abbey D, Filler SG, Dudley AM et al. 2018.  
445 Rapid Phenotypic and Genotypic Diversification After Exposure to the Oral Host Niche in *Candida*  
446 *albicans*. *Genetics* **209**: 725-741.
- 447 Forche A, Magee PT, Selmecki A, Berman J, May G. 2009. Evolution in *Candida albicans* populations during a single  
448 passage through a mouse host. *Genetics* **182**: 799-811.
- 449 Forche A, Magee PT, Selmecki A, Berman J, May G. 2009a. Evolution in *Candida albicans* populations during single  
450 passage through a mouse host. *Genetics* **182**: 799-811.
- 451 Forche A, May G, Magee PT. 2005. Demonstration of loss of heterozygosity by single-nucleotide polymorphism  
452 microarray analysis and alterations in strain morphology in *Candida albicans* strains during infection.  
453 *Eukaryot Cell* **4**: 156-165.
- 454 Ford CB, Funt JM, Abbey D, Issi L, Guiducci C, Martinez DA, Delorey T, Li BY, White TC, Cuomo C et al. 2015. The  
455 evolution of drug resistance in clinical isolates of *Candida albicans*. *Elife* **4**: e00662.

- 456 Fu Y, Phan QT, Luo G, Solis NV, Liu Y, Cormack BP, Edwards JE, Ibrahim AS, Filler SG. 2013. Investigation of the  
457 Function of *Candida albicans* Als3 by Heterologous Expression in *Candida glabrata*. *Infection and*  
458 *Immunity* doi:10.1128/iai.00013-13.
- 459 Gerstein AC, Ono J, Lo DS, Campbell ML, Kuzmin A, Otto SP. 2015. Too much of a good thing: the unique and  
460 repeated paths toward copper adaptation. *Genetics* **199**: 555-571.
- 461 Glasgow SC, Ramachandran S, Blackwell TS, Mohanakumar T, Chapman WC. 2007. Interleukin-1 $\beta$  is the primary  
462 initiator of pulmonary inflammation following liver injury in mice. *Am J Physiol Lung Cell Mol Physiol* **293**:  
463 L491-496.
- 464 Gresham D, Desai MM, Tucker CM, Jenq HT, Pai DA, Ward A, DeSevo CG, Botstein D, Dunham MJ. 2008. The  
465 repertoire and dynamics of evolutionary adaptations to controlled nutrient-limited environments in yeast.  
466 *PLoS genetics* **4**: e1000303-e1000303.
- 467 Hill JA, Ammar R, Torti D, Nislow C, Cowen LE. 2013. Genetic and genomic architecture of the evolution of  
468 resistance to antifungal drug combinations. *PLoS genetics* **9**: e1003390-e1003390.
- 469 Hirakawa MP, Martinez DA, Sakthikumar S, Anderson MZ, Berlin A, Gujja S, Zeng Q, Zisson E, Wang JM, Greenberg  
470 JM et al. 2015. Genetic and phenotypic intra-species variation in *Candida albicans*. *Genome Res* **25**: 413-  
471 425.
- 472 Höfs S, Mogavero S, Hube B. 2016. Interaction of *Candida albicans* with host cells: virulence factors, host defense,  
473 escape strategies, and the microbiota. *Journal of Microbiology* **54**: 149-169.
- 474 Janbon G, Sherman F, Rustchenko E. 1998. Monosomy of a specific chromosome determines L-sorbose utilization:  
475 a novel regulatory mechanism in *Candida albicans*. *Proc Natl Acad Sci U S A* **95**: 5150 - 5155.
- 476 Khannaa N, Stuehler C, Lünemann A, Wójtowicz A, Bochud P-Y, Leibundgut-Landmann S. 2016. Host response to  
477 fungal infections - how immunology and host genetics could help to identify and treat patients at risk.  
478 *Swiss Med Wkly* **146**: w14350.
- 479 Li H, Durbin R. 2009. Fast and accurate short read alignment with Burrows–Wheeler transform. *Bioinformatics* **25**:  
480 1754-1760.
- 481 Li H, Durbin R. 2010. Fast and accurate long-read alignment with Burrows-Wheeler transform. *Bioinformatics*  
482 *(Oxford, England)* **26**: 589-595.
- 483 Li H, Handsaker B, Wysoker A, Fennell T, Ruan J, Homer N, Marth G, Abecasis G, Durbin R. 2009. The Sequence  
484 Alignment/Map format and SAMtools. *Bioinformatics* **25**: 2078 - 2079.
- 485 Netea MG, Joosten LAB, van der Meer JWM, Kullberg B-J, van de Veerdonk FL. 2015. Immune defence against  
486 *Candida* fungal infections. *Nature Reviews Immunology* **15**: 630.
- 487 Noumi E, Snoussi M, Hentati H, Mahdouani K, del Castillo L, Valentin E, Sentandreu R, Bakhrouf A. 2010. Adhesive  
488 properties and hydrolytic enzymes of oral *Candida albicans* strains. *Mycopathologia* **169**: 269-278.
- 489 Park H, Myers CL, Sheppard DC, Phan QT, Sanchez AA, J EE, Filler SG. 2005. Role of the fungal Ras-protein kinase  
490 A pathway in governing epithelial cell interactions during oropharyngeal candidiasis. *Cell Microbiol* **7**: 499-  
491 510.
- 492 Phan QT, Myers CL, Fu Y, Sheppard DC, Yeaman MR, Welch WH, Ibrahim AS, Edwards JE, Filler SG. 2007. Als3 is a  
493 *Candida albicans* invasin that binds to cadherins and induces endocytosis by host cells. *PLoS Biol* **5**: e64.
- 494 Polvi EJ, Veri AO, Liu Z, Hossain S, Hyde S, Kim SH, Tebbji F, Sellam A, Todd RT, Xie JL et al. 2019. Functional  
495 divergence of a global regulatory complex governing fungal filamentation. *PLOS Genetics* **15**: e1007901.
- 496 Rustchenko EP, Howard DH, Sherman F. 1994. Chromosomal alterations of *Candida albicans* are associated with  
497 the gain and loss of assimilating functions. *J Bacteriol* **176**: 3231-3241.
- 498 Schonherr FA, Sparber F, Kirchner FR, Guiducci E, Trautwein-Weidner K, Gladiator A, Sertour N, Hetzel U, Le GTT,  
499 Pavelka N et al. 2017. The intraspecies diversity of *C. albicans* triggers qualitatively and temporally distinct  
500 host responses that determine the balance between commensalism and pathogenicity. *Mucosal Immunol*  
501 doi:10.1038/mi.2017.2.
- 502 Selmecki A, Forche A, Berman J. 2006. Aneuploidy and isochromosome formation in drug-resistant *Candida*  
503 *albicans*. *Science* **313**: 367-370.
- 504 Selmecki AM, Maruvka YE, Richmond PA, Guillet M, Shores N, Sorenson AL, De S, Kishony R, Michor F, Dowell R  
505 et al. 2015. Polyploidy can drive rapid adaptation in yeast. *Nature* **519**: 349-352.

- 506 Sem X, Le GTT, Tan ASM, Tso G, Yurieva M, Liao WWP, Lum J, Srinivasan KG, Poidinger M, Zolezzi F et al. 2016.  $\beta$ -  
507 glucan exposure on the fungal cell wall tightly correlates with competitive fitness of *Candida* species in  
508 the mouse gastrointestinal tract. *Frontiers in Cellular and Infection Microbiology* **6**: 186.
- 509 Skrzypek MS, Binkley J, Binkley G, Miyasato SR, Simison M, Sherlock G. 2017. The Candida Genome Database  
510 (CGD): incorporation of Assembly 22, systematic identifiers and visualization of high throughput  
511 sequencing data. *Nucleic Acids Research* **45**: D592-D596.
- 512 Solis NV, Filler SG. 2012. Mouse model of oropharyngeal candidiasis. *Nat Protocols* **7**: 637-642.
- 513 Solis NV, Swidergall M, Bruno VM, Gaffen SL, Filler SG. 2017. The Aryl Hydrocarbon Receptor Governs Epithelial  
514 Cell Invasion during Oropharyngeal Candidiasis. *mBio* **8**: e00025-00017.
- 515 Swidergall M, Filler SG. 2017. Oropharyngeal Candidiasis: Fungal Invasion and Epithelial Cell Responses. *PLoS*  
516 *Pathogens* **13**: e1006056.
- 517 Tso GHW, Reales-Calderon JA, Tan ASM, Sem X, Le GTT, Tan TG, Lai GC, Srinivasan KG, Yurieva M, Liao W et al.  
518 2018. Experimental evolution of a fungal pathogen into a gut symbiont. *Science* **362**: 589-595.
- 519 Untergasser A, Cutcutache I, Koressaar T, Ye J, Faircloth BC, Remm M, Rozen SG. 2012. Primer3—new capabilities  
520 and interfaces. *Nucleic Acids Research* **40**: e115-e115.
- 521 Verma A, Gaffen S, Swidergall M. 2017a. Innate Immunity to Mucosal Candida Infections. *Journal of Fungi* **3**: 60.
- 522 Verma A, Gaffen SL, Swidergall M. 2017b. Innate Immunity to Mucosal Candida Infections. *Journal of Fungi* **3**: 60.
- 523 Yona AH, Manor YS, Herbst RH, Romano GH, Mitchell A, Kupiec M, Pilpel Y, Dahan O. 2012. Chromosomal  
524 duplication is a transient evolutionary solution to stress. *Proceedings of the National Academy of Sciences*  
525 *of the United States of America* **109**: 21010-21015.
- 526 Zhu W, Phan QT, Boontheung P, Solis NV, Loo JA, Filler SG. 2012. EGFR and HER2 receptor kinase signaling mediate  
527 epithelial cell invasion by *Candida albicans* during oropharyngeal infection. *Proceedings of the National*  
528 *Academy of Sciences of the United States of America* **109**: 14194-14199.

529

530

531

532 Fig. S1. Summary of phenotypic evaluation of strain lineages. Shown are the conditions for which  
 533 differences in growth (A) and spot morphology (B) were seen either between the progenitor and the  
 534 trisomic strain(s) or between the different trisomic strains. Data is arranged by the day the plates were  
 535 scored, the incubation temperature and growth medium. Strains and their derivatives are ordered as  
 536 follows: progenitor, Chr6ABB, Chr6AAB, Chr5AAB. See Table S1 for strain information.

537

**A**

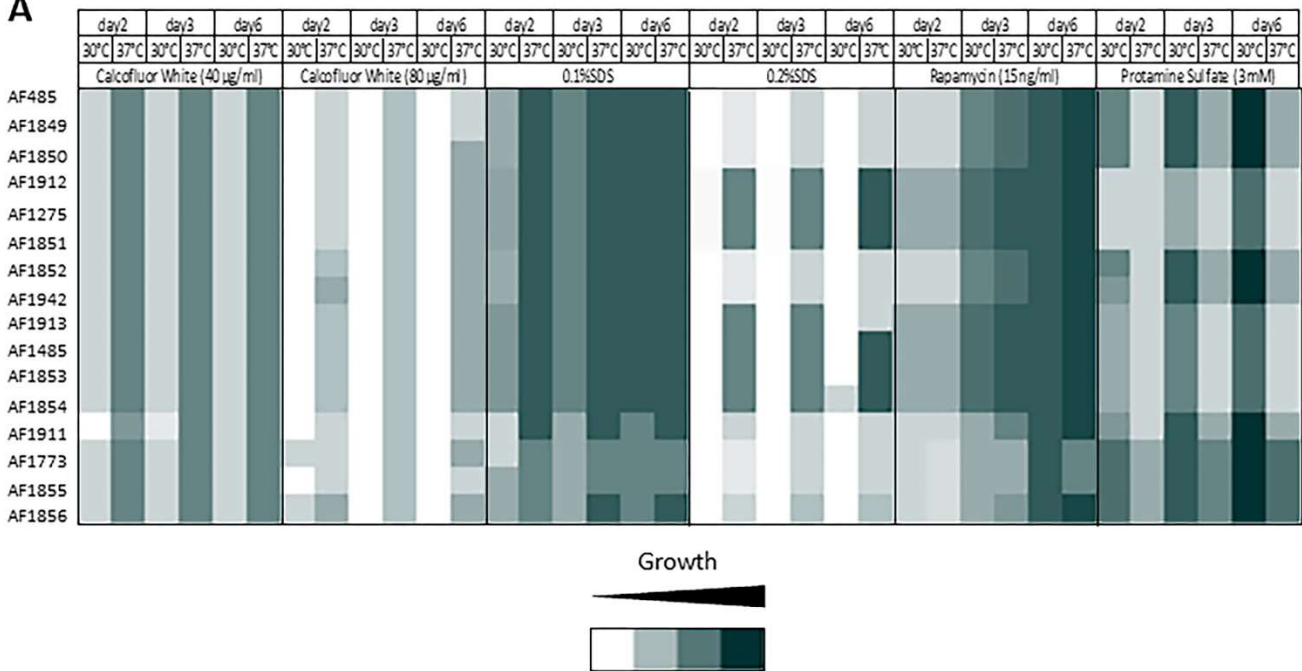

538

**B**

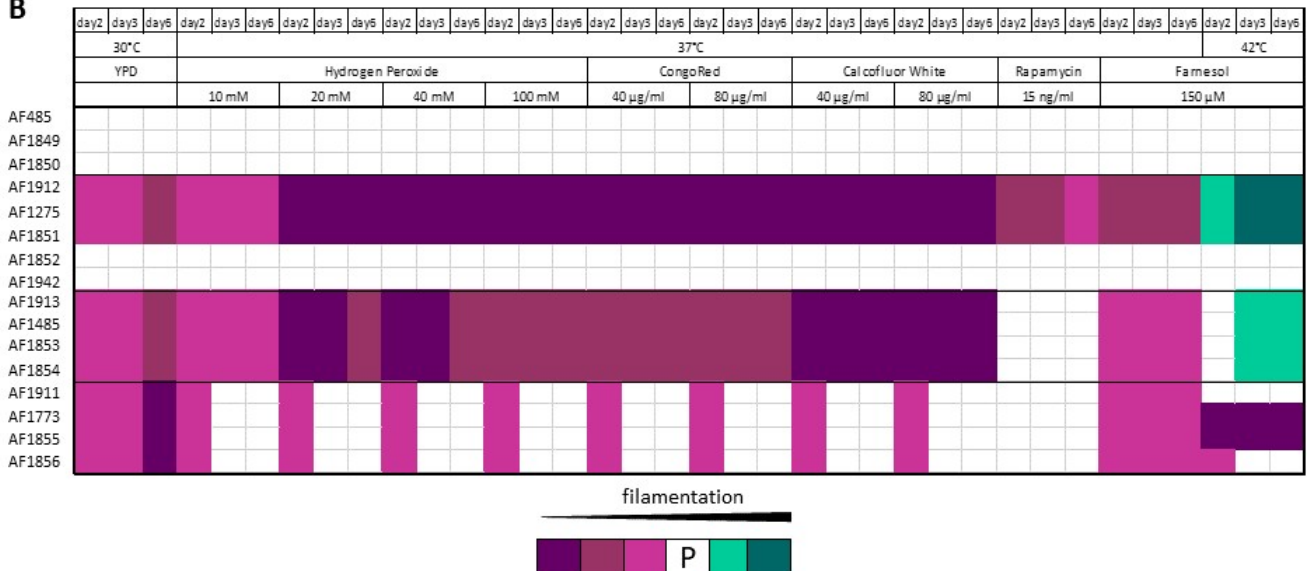

539



540

541 Fig.S2. Variable retention of trisomies suggest population heterogeneity *in vivo*. Ploidy genotypes were  
 542 stably maintained for the parent and the Chr5AAB lineage but not for either Chr6 lineage. The ploidy  
 543 genotypes of the indicate strains was determined by qPCR for 4 markers along each of the 8  
 544 chromosomes.

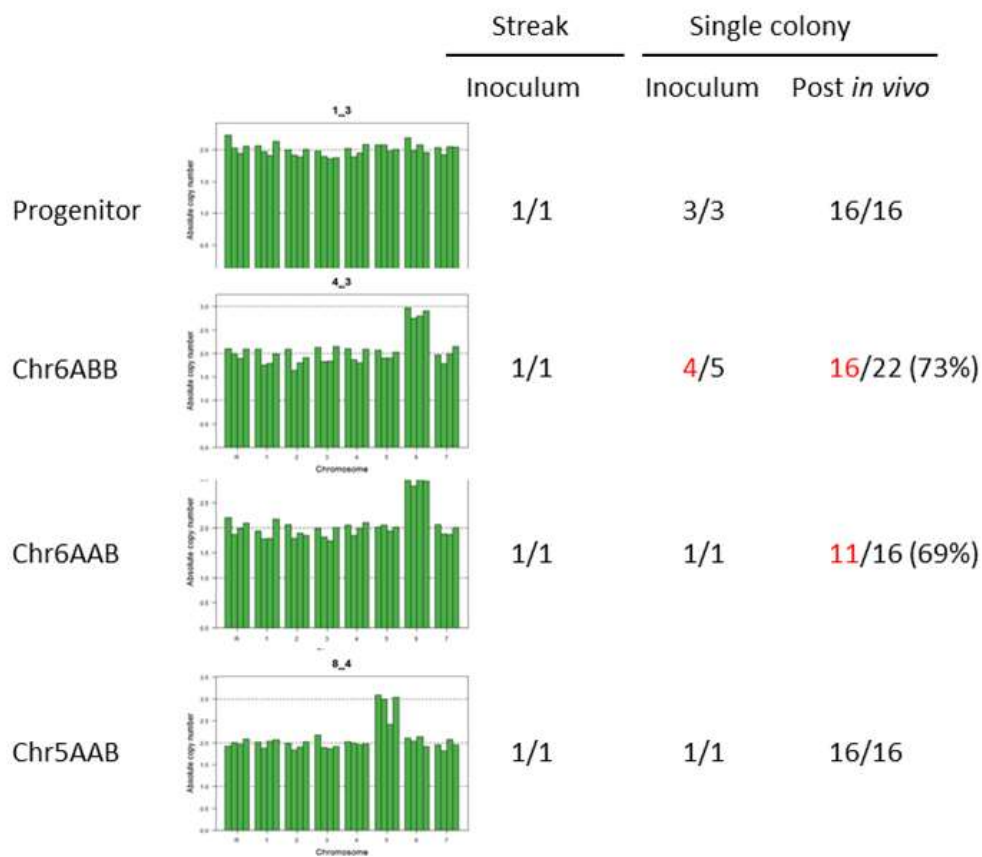

545

546
